# Supplementary material
Source: HighWire-hosted journal article supplement (https://ez-admanager.com/highwire/filestream/134721/field_highwire_adjunct_files/0/sanchez_juan_230.pdf)
Supplement: sanchez_juan_230.pdf [file sanchez_juan_230.pdf]

# Utilidad práctica del FDG-PET amiloide en un centro académico de demencia

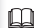

Pascual Sánchez-Juan,  
MD

Pia M. Ghosh, BA

Jayne Hagen, PhD

Benno Gesierich, PhD

Maya Henry, PhD

Lea T. Grinberg, MD,  
PhD

James P. O'Neil, PhD

Mustafa Janabi, PhD

Eric J. Huang, MD, PhD

John Q. Trojanowski,  
MD, PhD

Harry V. Vinters, MD

Marilyn Gorno-Tempini,  
MD, PhD

William W. Seeley, MD

Adam L. Boxer, MD,  
PhD

Howard J. Rosen, MD

Joel H. Kramer, PsyD

Bruce L. Miller, MD

William J. Jagust, MD

Gil D. Rabinovici, MD

## RESUMEN

**Objetivos:** Evaluar el efecto de las imágenes de amiloide en la toma de decisiones clínicas.

**Métodos:** Condujimos un análisis retrospectivo de 140 pacientes afectados cognitivamente (edad promedio 65.0 años, 46% con un diagnóstico primario  $\beta$ -amiloide (A $\beta$ ), *Mini-Mental State Examination* promedio 22,3) que fueron sometidos a un PET amiloide (*Pittsburgh compound B* (PiB)) como parte de estudios de investigación observacionales y fueron evaluados clínicamente antes y después del estudio. Ciento treinta y cuatro fueron sometidos concurrentemente a PET-fluorodesoxiglucosa (FDG). Evaluamos los cambios entre el diagnóstico clínico pre y post PET (de un diagnóstico A $\beta$  a un diagnóstico no A $\beta$  o viceversa) y el plan de tratamiento de la enfermedad de Alzheimer. La asociación entre los resultados de PiB/FDG y los cambios en el manejo fueron evaluados utilizando  $\chi^2$  y regresión logística multivariada. Un diagnóstico post mortem estaba disponible para 24 pacientes (17%).

**Resultados:** La concordancia entre los resultados de las imágenes y el diagnóstico de base fue alto (PiB 84%, FDG 82%). El diagnóstico primario cambió luego del PET en 13/140 pacientes (9%) en total, pero en 5/13 (38%) los pacientes eran considerados como dilemas diagnósticos pre-PET. Cuando se examinó independientemente, los PiB y FDG discordantes estaban ambos asociados con un cambio diagnóstico ( $p < 0,0001$  no ajustada). Sin embargo, cuando se examinaron en conjunto, con una regresión logística multivariada, solo los PiB discordantes permanecieron significativos (valor de  $p$  ajustado = 0,00013). Los cambios en el tratamiento se asociaron a PiB discordantes en pacientes con diagnósticos no A $\beta$  (valor de  $p$  ajustado = 0,028), mientras que la FDG no tuvo efecto sobre el tratamiento. Ambos, el PiB (96%) y el FDG (91%) mostraron una alta concordancia con el diagnóstico en la autopsia

**Conclusiones:** El PET tuvo un efecto moderado en los resultados clínicos. La PiB discordante tuvo un efecto mayor que la FDG discordante, y la influencia en el diagnóstico fue mayor que en el tratamiento. Se necesitan estudios prospectivos para caracterizar mejor el rol clínico del PET amiloide. *Neurology*® 2014;82:230-238.

## GLOSARIO

A $\beta$  =  $\beta$ -amiloide; CAU = criterio apropiado de uso; CDR = *Clinical Dementia Rating*; CMS = centros de servicios de Medicare & Medicaid; DCL = demencia con cuerpos de Lewis; DCM = deterioro cognitivo mínimo; DFT = demencia fronto temporal; EA = enfermedad de Alzheimer; FDG = fluorodesoxiglucosa; I-Che = inhibidor de la colinesterasa; PiB = *Pittsburgh compound B*; SCB = síndrome córtico-basal; UCSF = *University of California, San Francisco*.

Los ligandos del PET que se unen al  $\beta$ -amiloide fibrilar (A $\beta$ ) permiten la detección *in vivo* de placas de amiloide, una característica central de la patología de la enfermedad de Alzheimer (EA).<sup>1</sup> El uso del primer trazador específico de A $\beta$ , el *Pittsburgh compound B* (PiB) ha estado limitado a centros de investigación debido a la corta vida media del radio trazador carbono-11 (20 minutos). Los trazadores de A $\beta$  marcados con fluorine-18 (<sup>18</sup>F,  $t_{1/2}$  = 110 minutos) han sido desarrollados subsecuentemente para el uso clínico y uno ha sido recientemente aprobado por la *US Food and Drug Administration*.<sup>2</sup> Pocos estudios han evaluado el efecto del PET amiloide en el diagnóstico y tratamiento de los pacientes.<sup>3-6</sup> En una decisión reciente, los centros de servicios de Medicare & Medicaid (CMS) concluyeron que los datos son insuficientes para demostrar que los resultados clínicos están afectados por las imágenes de amiloide como para justificar el reembolso de los estudios.<sup>7</sup>

Nuestro centro ha conducido estudios de investigación aplicando PiB y <sup>18</sup>F-fluorodesoxiglucosa (FDG)-PET para evaluar la utilidad del PET en el diagnóstico diferencial<sup>8</sup> y para estudiar los mecanismos de la EA.<sup>9-12</sup> A pesar de que estos estudios no fueron diseñados

Dirección para correspondencia al  
Dr. Sánchez-Juan:  
ifimav.biobanco1@fmdv.org

Del *Memory and Aging Center and Department of Neurology* (P.S.-J., P.M.G., J.H., B.G., M.H., L.T.G., M.G.-T., W.W.S., A.L.B., H.J.R., J.H.K., B.L.M., W.J.J., G.D.R.) and *Department of Pathology and Laboratory Medicine* (E.J.H.), *University of California, San Francisco*; *University Hospital Universitario "Marqués de Valdecilla," IFIMAV y Centro de Investigación Biomédica en Red sobre Enfermedades Neurodegenerativas* (P.S.-J.), Santander, España; *Helen Wills Neuroscience Institute* (P.M.G., W.J.J., G.D.R.), *University of California, Berkeley*; *Lawrence Berkeley National Laboratory* (P.M.G., J.P.O., M.J., W.J.J., G.D.R.), Berkeley, CA; *Center for Neurodegenerative Research* (J.Q.T.), *University of Pennsylvania, Philadelphia*; and *Department of Pathology and Laboratory Medicine* (H.V.V.), *University of California, Los Angeles*.

Ir a [Neurology.org](http://Neurology.org) para declaraciones de intereses completas. La información sobre financiamiento del estudio y declaraciones de intereses consideradas relevantes por los autores, si existiesen, se encuentran al final del artículo.

para evaluar la toma de decisiones clínicas, los resultados de los estudios por imágenes eran proporcionados a los médicos y podían ser tenidos en cuenta en el manejo de los pacientes. Aquí reportamos un análisis retrospectivo de la asociación entre resultados del PET y cambios subsecuentes en el diagnóstico y tratamiento farmacológico de la EA. Planteamos la hipótesis de que el PiB-PET tendría un mayor efecto que la FDG en el diagnóstico y tratamiento, dada su especificidad bioquímica para neuropatología amiloide. Mientras que no podemos controlar para variables adicionales que podrían haber afectado estos resultados (por ej., evolución de los síntomas, disponibilidad de resultados de tests adicionales), este análisis provee una visión preliminar en la influencia del PiB y la FDG en la toma de decisiones clínicas en un centro académico de demencia.

**MÉTODOS Selección de sujetos y evaluación clínica de base.** Buscamos en la base de datos de la *University of California, San Francisco (UCSF) Memory and Aging Center* e identificamos 140 pacientes que habían sido sometidos a PET amiloide (PiB) y habían sido evaluados clínicamente antes y después del estudio, sobre un total de 174 pacientes afectados cognitivamente estudiados con PiB entre 2005 y 2011. Los estudios fueron realizados mediante protocolos de investigación que evalúan la utilidad del PiB en el diagnóstico diferencial del espectro de enfermedades de EA y demencia fronto temporal (DFT) y estudios que evalúan la relación entre la deposición de amiloide y el fenotipo clínico de EA.<sup>8-12</sup> Los pacientes con comorbilidades médicas inestables, lesiones ocupantes de espacio cerebrales y enfermedad cerebrovascular significativa no eran elegibles. La evaluación clínica pre-PET incluía una evaluación por un neurólogo cognitivo, una entrevista con un cuidador, test cognitivo y neuroimágenes estructurales. Los biomarcadores en LCR de la EA no estaban disponibles. El diagnóstico clínico fue realizado por consenso en una conferencia multidisciplinaria. Se podían listar hasta 3 puntos en el "diagnóstico diferencial", ordenados en orden de probabilidad. El diagnóstico fue realizado basado en el mejor juicio clínico, aunque 89% de los pacientes reunían criterios publicados de investigación para su diagnóstico clínico primario.<sup>13-19</sup>

**Interpretación del PET.** Los pacientes fueron sometidos a PiB-PET (100%) y FDG-PET (96%) en el *Lawrence Berkeley National Laboratory*.<sup>8</sup> Las imágenes por PET fueron interpretadas visualmente por un examinador experimentado (W.J.J. o G.D.R.) como positivo/negativo para consumo del trazador cortical (PiB+/PiB-), como ha sido previamente descrito y validado comparado con la clasificación cuantitativa.<sup>8</sup> Las imágenes de FDG fueron clasificadas como consistentes con "EA" o sus variantes (que incluyen demencia con cuerpos de Lewy [DCL]) si el hipometabolismo involucraba principalmente la corteza témpero-parietal, del cíngulo posterior/precúneo o la corteza occipital. Las imágenes fueron clasificadas como "no-EA" si el hipometabolismo involucraba principalmente el frontal o la corteza temporal anterior (patrón de DFT)<sup>8</sup> o aparecía dentro de límites normales. Más allá de estas guías, se les permitía a los examinadores ejercitar un juicio clínico en la clasificación de las imágenes. Las clasificaciones PiB y FDG fueron realizadas ciegas a los datos clínicos y en sesiones separadas, con las lecturas de PiB ciegas a los resultados de la FDG y viceversa. Cuando ambas lecturas se completaban, se entregaba un reporte al médico tratante responsable, que incluía la clasificación dicotómica de cada imagen y una descripción escrita del patrón espacial de unión de cada trazador.

**Evaluación clínica post-PET.** La visita post-PET incluía una evaluación clínica y revisión de los resultados del PET. Se repitió la evaluación cognitiva en 54% de los pacientes y una nueva RM estaba disponible en 49%. El diagnóstico fue realizado por consenso.

**Verificación del tratamiento farmacológico de la EA.** Las historias clínicas de los pacientes fueron revisadas retrospectivamente por el investigador asociado (P.M.G.) para determinar el uso de medicaciones sintomáticas de la EA (donepecilo, galantamina, rivastigmina y memantina) durante las visitas pre y post-PET.

**Estudios neuropatológicos.** Las autopsias siguieron procedimientos estándar para la evaluación de demencias.<sup>20</sup> El consenso de diagnóstico neuropatológico fue utilizado para la EA<sup>21</sup> y el espectro de enfermedades de degeneración fronto temporal.<sup>22</sup> Las autopsias fueron realizadas en la UCSF (n = 22), la Universidad de Pensilvania (n = 1) y la Universidad de California, Los Ángeles (n = 1).

**Aprobaciones de protocolos estándar, registros y consentimiento informado.** Se obtuvo consentimiento informado por escrito de todos los pacientes o sustitutos. El estudio fue aprobado por los comités institucionales para la investigación humana de la *University of California* (San Francisco y Berkeley) y el *Lawrence Berkeley National Laboratory*.

**Análisis de datos.** Los diagnósticos clínicos pre-PET fueron divididos en categorías "Aβ" y "no-Aβ" basados en la asociación del síndrome clínico con la patología amiloide (tabla 1). Los diagnósticos de Aβ consistieron principalmente de presentaciones "típicas" (con predominio de la memoria) y "atípicas" de la EA.<sup>23,24</sup> La categoría "no-Aβ" consistía principalmente de variantes clínicas de la DFT. Los pacientes con un síndrome córtico basal (SCB) fueron divididos entre los que se sospechaba una patología de EA (SCB-EA) o no-EA (SCB-no-EA).<sup>20</sup> El deterioro cognitivo mínimo (DCM) amnésico fue incluido en la categoría Aβ y el DCM no amnésico fue considerado un diagnóstico no Aβ.<sup>18</sup> En casos con múltiples diagnósticos diferenciales, el primer diagnóstico de la lista era considerado "primario". Los pacientes en los que ambos diagnósticos Aβ y no-Aβ estaban incluidos en la lista de diagnósticos diferenciales fueron considerados "dilemas diagnósticos".

El predictor primario de interés fue la concordancia entre las lecturas del PET y el diagnóstico clínico. Las imágenes de PiB+/FDG-EA fueron consideradas concordantes con un diagnóstico de EA, mientras que las PiB-/FDG-no-EA fueron consideradas como un diagnóstico no-EA. La medida de los resultados primarios fue definida como cambios en 1) el diagnóstico primario y 2) el tratamiento farmacológico de la EA entre las visitas pre y post-PET. El cambio en el diagnóstico primario fue definido como un cambio en el primer diagnóstico de la lista de Aβ a no-Aβ y viceversa. El cambio en el tratamiento farmacológico de la EA fue definido como comienzo o discontinuación de inhibidores de la colinesterasa (I-Che) o memantina.

Primero evaluamos la relación entre los resultados del PET y los resultados clínicos separadamente para PiB y FDG utilizando  $\chi^2$  o *Fisher exact test*. Luego, evaluamos el impacto de un PiB discordante o un FDG discordante en conjunto en cada medida de resultado por medio de la inclusión de ambos en el mismo modelo de regresión logística. Finalmente, utilizando regresión logística, realizamos una predicción de cada resultado teniendo en cuenta los siguientes predictores: PiB discordante, FDG discordante, dilema diagnóstico pre-PET, sexo, edad al momento del PET < 65 años, diagnóstico basal Aβ, "nuevo paciente" (seguido en nuestro centro por menos de 1 año) y un score del *Clinical Dementia Rating* (CDR) < 1.

**RESULTADOS Concordancia del PET con el diagnóstico clínico.** La cohorte era relativamente joven, levemente afectada y la mayoría eran pacientes nuevos (tabla 1). La concordancia total entre los resultados de las imágenes y el diagnóstico pre-PET fue de 84% para el PiB y de 82% para FDG. La concordancia del PiB fue más alta que la concordancia de FDG en la EA típica y la concordancia del PiB fue más alta en la EA que en el SCB (figura, A).

| Tabla 1 Características clínicas y demográficas de los pacientes |                 |
|------------------------------------------------------------------|-----------------|
| Edad al momento del PET, a                                       | 65.0 ± 8.2      |
| Sexo (femenino), %                                               | 41              |
| Nuevos pacientes (seguidos por < 1 año), %                       | 55              |
| MMSE                                                             | 22,7 ± 9,0      |
| Dilemas diagnósticos, %                                          | 19              |
| Meses desde la visita pre- a la post-PET                         | 9.6 ± 5.8       |
| Diagnóstico clínico primario (Aβ/no-Aβ), %                       | 46/54           |
| Tratamiento de base de la EA (I-ChE/memantina), %                | 47/39           |
| CDR < 1, %                                                       | 42 <sup>a</sup> |
| Diagnóstico clínico pre-PET, n (% total)                         |                 |
| Aβ                                                               |                 |
| EA                                                               | 25 (17)         |
| APP: variante logopéica                                          | 11 (8)          |
| EA: variante frontal                                             | 6 (4)           |
| Atrofia cortical posterior                                       | 14 (10)         |
| DCM amnésico                                                     | 1 (1)           |
| SCB-EA                                                           | 6 (4)           |
| No-Aβ                                                            |                 |
| DCM no amnésico                                                  | 9 (6)           |
| vcDFT                                                            | 27 (19)         |
| APP: variante no fluente                                         | 10 (7)          |
| APP: variante semántica                                          | 15 (11)         |
| SCB-no-EA                                                        | 12 (9)          |
| Otros <sup>b</sup>                                               | 4 (3)           |

Abreviaturas: APP = afasia primaria progresiva; Aβ = β-amiloide; CDR = *Clinical Dementia Rating*; DCM = deterioro cognitivo mínimo; vcDFT = variante conductual de la demencia fronto temporal; EA = enfermedad de Alzheimer; I-ChE = inhibidor de la colinesterasa; MMSE = *Mini-Mental State Examination*; SCB-EA = síndrome córtico-basal con patología de EA esperada; SCB-no-EA = síndrome córtico-basal con patología esperada no-EA.

Las variables continuas se presentan como promedio ± DE.

<sup>a</sup>Faltan datos para 5 pacientes.

<sup>b</sup>Enfermedad por priones, síndrome paraneoplásico, injuria traumática cerebral, psiquiátrico.

La concordancia del PiB fue más alta en pacientes afectados más severamente (figura, B) pero no estaba afectada por edad de comienzo (figura, C). En total, el PiB y el FDG estaban de acuerdo en la clasificación del 83% de los pacientes. Dos imágenes por PiB fueron consideradas positivas “borderline” basadas en el consumo cortical focal. Estas imágenes fueron consideradas PiB+, pero la distribución focal del consumo del trazador fue descrita en el reporte.

**Cambios en los diagnósticos.** Los diagnósticos primarios cambiaron luego del PET en 13/140 pacientes (9%). Las asociaciones independientes entre cada predictor y los cambios en el diagnóstico se muestran en la tabla 2 (valor de *p* no ajustado). Los resultados sobre el PiB discordante y el FDG discordante, testeados por separado, estuvieron ambos fuertemente asociados con el cambio diagnóstico. Hubo una tendencia en los

pacientes que se presentaron como dilemas diagnósticos pre-PET, donde los cambios fueron más comunes (tabla 2).

Cuando se incluyeron ambos PET como predictores en un modelo de regresión logística simple, los cambios diagnósticos estaban asociados con un PiB discordante (*p* < 0,0001), pero no con un FDG discordante (*p* = 0,27). Esto se demuestra aún más en la tabla 3, que relaciona los cambios diagnósticos con combinaciones de resultados de PiB y FDG. Los cambios diagnósticos eran más probables cuando ambas imágenes eran discordantes (8/11), mientras que no hubo cambios cuando el FDG era discordante, pero el PiB estaba de acuerdo con el diagnóstico clínico (0/12). Se presentan en la tabla 2 los resultados completos del modelo de regresión logística (valor de *p* ajustado). Los cambios en el diagnóstico estuvieron asociados con un PiB discordante y un estatus de “paciente nuevo”. El FDG discordante no fue significativo en el modelo completo.

**Incertidumbre clínica.** El número de dilemas diagnósticos disminuyó de un 19% pre-PET a un 11% post-PET (*p* = 0,09), con resolución de 14 dilemas pre-PET, pero creación de 4 nuevos dilemas.

**Cambios en el tratamiento.** Ni el PiB discordante ni el FDG discordante estuvieron asociados con cambios en el tratamiento cuando se los evaluó por separado (valor de *p* no ajustado para PiB = 0,33; valor de *p* no ajustado para FDG = 0,48) o tampoco cuando se los evaluó en el mismo modelo (*p* PiB = 0,36; *p* FDG = 0,72). En el modelo completo de regresión logística, hubo una tendencia hacia una asociación con el PiB discordante (valor de *p* ajustado = 0,07). Este hallazgo fue significativo en el subgrupo de pacientes con un síndrome no-Aβ (valor de *p* no ajustado = 0,054; valor de *p* ajustado = 0,028). En un análisis a posteriori encontramos que este efecto era conducido por cambios en los I-Ches (valor de *p* no ajustado = 0,02; valor de *p* ajustado = 0,015).

**Casos neuropatológicamente confirmados.** Las autopsias estaban disponibles para 24 pacientes (17%, tiempo promedio entre el PET y la muerte 36.7 ± 4.3 meses; tabla 4). Los resultados del PiB eran consistentes con la presencia de EA patológicamente confirmada (umbral de probabilidad intermedia del *National Institute Aging-Reagan*)<sup>21</sup> en 23/24 pacientes. En un paciente, el diagnóstico clínico fue correctamente cambiado de SCB-EA a SCB-no-EA, luego de que las imágenes por PET mostraron PiB-/FDG-no-EA. El diagnóstico *post mortem* fue degeneración córtico-basal. El diagnóstico clínico fue dejado sin cambios apropiadamente (de afasia primaria progresiva, variante no fluente) en un paciente con un PiB+ discordante, pero FDG-no-EA, donde se encontró subsecuentemente que tenía enfermedad de Pick con copatología de EA.<sup>25</sup> Un paciente con una probabilidad baja de EA tenía una imagen PiB+ *borderline*, posiblemente debido a la presencia de placas Aβ difusas frecuentes, que también se sabe que se unen a PiB.<sup>26</sup> El resultado del PiB no llevó a un cambio en el diagnóstico primario no-Aβ. Cuatro dilemas diagnósticos fueron resueltos correctamente luego del PET y los I-Ches fueron discontinuados apropiadamente en 2 pacientes.

Figura Concordancia entre el diagnóstico clínico pre-PET y los resultados del PET

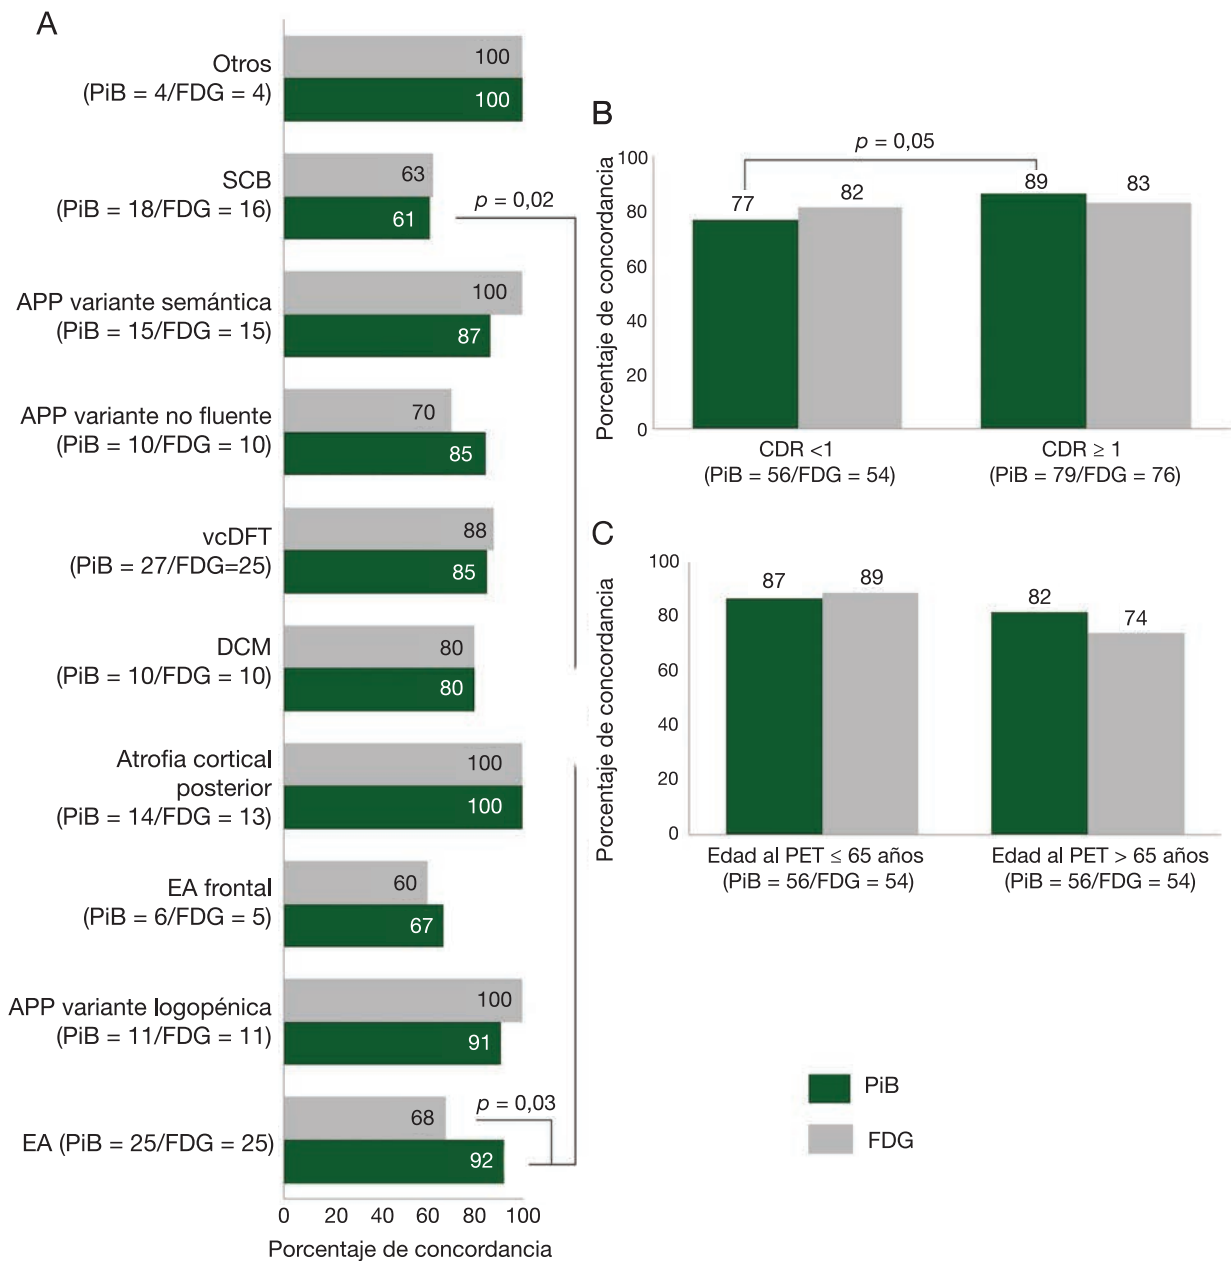

Los números se refieren al número de sujetos. (A) Concordancia entre diagnósticos clínicos específicos y el PET. (B) Concordancia versus nivel de deterioro, estratificado por el CDR. (C) Concordancia versus edad de comienzo. Las diferencias significativas en concordancia están indicadas con sus respectivos valores de  $p$ . APP = afasia primaria progresiva; CDR = *Clinical Dementia Rating*; DCM = deterioro cognitivo mínimo; vcDFT = variante conductual de la demencia fronto temporal; EA = enfermedad de Alzheimer; FDG = fluorodesoxiglucosa; PiB = *Pittsburgh compound B*; SCB = síndrome córtico-basal.

**DISCUSIÓN** Reportamos sobre la relación entre los resultados del PET amiloide y FDG y los cambios en el manejo clínico en una muestra grande y heterogénea de pacientes afectados cognitivamente vistos en nuestro centro académico de demencia. En conjunto, encontramos una alta concordancia entre el diagnóstico clínico inicial y ambos resultados del PiB y el FDG, lo que sugiere un rol confirmatorio para las imágenes en la mayoría de los pacientes. Los cambios en el diagnóstico primario ocurrieron en un bajo porcentaje de los casos (9%). Cuando se realizaron cambios, estos estuvieron asociados fuertemente a un PiB discordante, mientras que el efecto del FDG discordante no fue significativo en

el análisis multivariado. La influencia del PET en el tratamiento de la EA fue más modesta, pero nuevamente el PiB tuvo un efecto más fuerte que el FDG. En conjunto, nuestros datos apoyan un rol clínico limitado para las imágenes de amiloide.

La alta concordancia entre el PET amiloide y el diagnóstico clínico en nuestro estudio (84%) explica la baja tasa de cambios en el diagnóstico. Las tasas de concordancia en estudios previos han variado entre 58% y 82% dependiendo de la complejidad de los pacientes incluidos.<sup>3-6</sup> Mientras que nuestra tasa conjunta de cambios diagnósticos post-PET fue menor que la previamente reportada (23%-55%),<sup>4-6</sup> los diagnósticos cambiaron en 38%

**Tabla 2 Factores asociados con cambios en el diagnóstico**

| Predictores                                        | Sin cambio en el diagnóstico (n = 127), % | Con cambio en el diagnóstico (n = 13), % | Valor de p no ajustado <sup>a</sup> | Valor de p ajustado <sup>a</sup> |
|----------------------------------------------------|-------------------------------------------|------------------------------------------|-------------------------------------|----------------------------------|
| Edad < 65                                          | 54                                        | 54                                       | 0,98                                | 0,39                             |
| Femenino                                           | 41                                        | 45                                       | 0,72                                | 0,23                             |
| Diagnóstico clínico A $\beta$ pre-PET              | 46                                        | 46                                       | 0,97                                | 0,87                             |
| Dilema pre-PET                                     | 17                                        | 38                                       | 0,053                               | 0,62                             |
| PIB discordante con el diagnóstico clínico pre-PET | 8                                         | 92                                       | < 0,0001                            | 0,00013                          |
| FDG discordante con el diagnóstico clínico pre-PET | 13                                        | 62                                       | < 0,0001                            | 0,087                            |
| CDR < 1 <sup>b</sup>                               | 41                                        | 46                                       | 0,72                                | 0,26                             |
| Paciente nuevo (seguido por < 1 año)               | 55                                        | 69                                       | 0,32                                | 0,04                             |

Abreviaturas: A $\beta$  =  $\beta$ -amiloide; CDR = *Clinical Dementia Rating*; FDG = fluorodesoxiglucosa; PIB = *Pittsburgh compound B*.

<sup>a</sup>Los valores no ajustados de p fueron derivados de comparaciones univariadas. Los valores ajustados de p fueron derivados de una regresión logística que incluyó a todos los predictores del modelo.

<sup>b</sup>Faltan datos de 5 pacientes.

de los pacientes que se presentaron como dilemas diagnósticos pre-PET, lo que está en línea con los resultados de otros estudios que incluyeron casos clínicos dudosos.<sup>4-6</sup> Las diferencias en la selección de pacientes, las variables demográficas y el diseño del estudio podría explicar la variación en el efecto observado del PET amiloide sobre el diagnóstico clínico a través de los estudios.

Un grupo de trabajo de visualización del amiloide (*Amyloid Imaging Task Force*) recomendó criterios de uso apropiado (CUA) para las imágenes de amiloide en la clínica.<sup>27</sup> Los CUA establecen que el PET amiloide debería ser considerado solamente en pacientes con déficits cognitivos objetivos en quienes hay una significativa incertidumbre diag-

nóstica luego de una evaluación comprensiva por un experto en demencias y cuando se espera que los resultados de las imágenes aumenten la certeza diagnóstica y modifiquen el manejo terapéutico. Diecinueve por ciento de los pacientes en este estudio cumplían los criterios de “dilema diagnóstico”, y la tasa de cambios diagnósticos fue más alta en estos casos, lo que demuestra que los médicos pueden identificar un subgrupo de pacientes en quienes el PET amiloide será más útil clínicamente. Los CUA resaltan 3 escenarios clínicos en los cuales las imágenes de amiloide podrían tener una utilidad inmediata: 1) DCM, 2) demencia atípica y 3) demencia de inicio temprano (< 65 años). Nuestro estudio provee datos preliminares para validar 2 de estas indicaciones clínicas. Aunque solo un 7% de los pacientes fueron diagnosticados con DCM, un 42% tenía un CDR < 1, lo que indica que un diagnóstico específico degenerativo fue realizado en un estadio clínicamente leve. La concordancia entre el PET amiloide y el diagnóstico clínico fue menor en estos pacientes, y demuestra el valor agregado del PET amiloide en los pacientes levemente afectados. De forma similar, las tasas de concordancia fueron menores en pacientes con ciertos síndromes atípicos (SCB, EA variante frontal), lo que sugiere que es más probable que las imágenes clínicas cambien el manejo en estos pacientes. A pesar de que nuestro estudio incluyó un gran número de pacientes de comienzo temprano, no encontramos un efecto de la edad sobre la concordancia del PET o los resultados clínicos. Estos resultados deberían ser interpretados con precaución, pero sugieren de forma preliminar un rol confirmatorio de las imágenes de amiloide en pacientes de comienzo temprano con fenotipos clínicos sencillos.

Nuestros datos sugieren fuertemente que las imágenes de amiloide tienen un efecto mayor en el diagnóstico clínico que el FDG-PET en la distinción de enfermedades con y sin patología amiloide. El PIB discordante estaba altamente asociado con cambios en el diagnóstico en el análisis multivariado, mientras que el FDG no afectó el diagnóstico cuando se controló para resultados de PET amiloide. La confianza de los médicos sobre el PIB más

**Tabla 3 Resultados combinados del PIB/FDG y cambios en el diagnóstico**

| Diagnóstico clínico pre-PET | Resultados del PET | No. de cambios en el diagnóstico luego del PET/total | Cambios específicos en el diagnóstico                                                     |
|-----------------------------|--------------------|------------------------------------------------------|-------------------------------------------------------------------------------------------|
| No-A $\beta$                | PIB-/FDG-no-EA     | 0/54                                                 |                                                                                           |
|                             | PIB+/FDG-no-EA     | 2/6                                                  | vcDFT a vFEA/vascular; VS-APP a vFEA                                                      |
|                             | PIB-/FDG-EA        | 0/4                                                  |                                                                                           |
|                             | PIB+/FDG-EA        | 5/8                                                  | vcDFT a vFEA; DCMna a DCMa; vcDFT a vFEA/vascular; SCB-no-EA a SCB-EA; SCB-no-EA a EA/DCL |
|                             | PIB-/FDG n/a       | 0/4                                                  |                                                                                           |
| A $\beta$                   | PIB-/FDG-no-EA     | 3/4                                                  | EA a SCB-no-EA; EA/DCL a DCMna; VL-APP a SCB-no-EA                                        |
|                             | PIB+/FDG-no-EA     | 0/8                                                  |                                                                                           |
|                             | PIB-/FDG-EA        | 2/4                                                  | VL-APP a SCB-no-EA; DCMna a SCB-no-EA                                                     |
|                             | PIB+/FDG-EA        | 1/46                                                 | vFEA a vcDFT <sup>b</sup>                                                                 |
|                             | PIB+/FDG n/a       | 0/2                                                  |                                                                                           |

Abreviaturas: VL-APP variante logopélica de la afasia primaria progresiva; VS-APP = variante semántica de la afasia primaria progresiva; A $\beta$  =  $\beta$ -amiloide; DCL = demencia con cuerpos de Lewy; DCM = deterioro cognitivo mínimo; DCMa = deterioro cognitivo mínimo amnésico; DCMna = DCM no amnésico; vcDFT = variante conductual de la demencia fronto temporal; EA = enfermedad de Alzheimer; vFEA = variante frontal de la EA; FDG = fluorodesoxiglucosa; n/a = no disponible; PIB = *Pittsburgh compound B*; SCB-EA = síndrome córtico-basal con patología de Alzheimer esperada; SCB-no-EA = síndrome córtico-basal con patología esperada no Alzheimer.

<sup>b</sup>Se encontró una mutación patogénica de degeneración lobar fronto temporal entre las visitas pre y post PET

**Tabla 4 Resultados del PET y efectos clínicos en pacientes con confirmación neuropatológica**

| Resultados del PET     | Diagnóstico clínico pre-PET | Diagnóstico patológico primario         | Diagnósticos patológicos contribuyentes | Patología de EA CERAD (0-3) | Patología de EA Braak (0-6) | Efectos clínicos                               |
|------------------------|-----------------------------|-----------------------------------------|-----------------------------------------|-----------------------------|-----------------------------|------------------------------------------------|
| <b>PiB- /FDG-no-EA</b> | APP-NF                      | DLFT-Tau (PSP)                          |                                         | 0                           | 2                           |                                                |
|                        | DFT-ELA                     | DLFT-TDP-43 (tipo B)                    | Infarto hemorrágico                     | 0                           | 2                           |                                                |
|                        | VS -APP                     | DLFT-TDP-43 (tipo C)                    | PSP                                     | 0                           | 1                           | Tx (se discontinuó memantina)                  |
|                        | <b>SCB-EA</b>               | <b>DLFT-Tau (DCB)</b>                   |                                         | <b>0</b>                    | <b>0</b>                    | <b>Dx</b>                                      |
|                        | vcDFT                       | DLFT-TDP-43 (tipo NA)                   |                                         | 0                           | 3                           |                                                |
|                        | VS-APP                      | DLFT-Tau (Pick)                         |                                         | 2                           | 1                           |                                                |
|                        | SCB-no-EA                   | DLFT-TDP-43 (tipo A)                    | Tauopatía inespecífica                  | 1                           | 0                           | DL+                                            |
|                        | APP-NF                      | DLFT-Tau (DCB)                          | Cambios vasculares                      | 1                           | 1                           |                                                |
|                        | VS-APP                      | DLFT-TDP-43 (tipo B)                    | EA                                      | 2                           | 4                           | DL-, tx (comenzó memantina, discontinuó I-Che) |
|                        | DFT-ELA                     | DLFT-TDP-43 (tipo B)                    |                                         | 0                           | 2                           |                                                |
|                        | DFT-ELA                     | DLFT-TDP-43 (tipo B)                    |                                         | 3                           | 1                           |                                                |
| <b>PiB+ /FDG-EA</b>    | EA                          | EA                                      |                                         | 3                           | 6                           |                                                |
|                        | EA                          | EA                                      |                                         | 3                           | 6                           |                                                |
|                        | EA                          | EA                                      |                                         | 3                           | 6                           |                                                |
|                        | EA                          | EA                                      |                                         | 3                           | 6                           |                                                |
|                        | EA+DCL                      | EA                                      | DCL, cambios vasculares                 | 3                           | 6                           |                                                |
|                        | EA+DCL                      | EA+DCL                                  |                                         | 3                           | 6                           |                                                |
|                        | EA                          | EA+DCL                                  |                                         | NA                          | NA                          | DL-                                            |
|                        | SCB-EA                      | EA                                      | DLFT-Tau (DCB), cambios vasculares      | 3                           | 6                           | DL-                                            |
| <b>PiB+ /FDG-no-EA</b> | <b>APP-NF</b>               | <b>DLFT-Tau (Pick)</b>                  | <b>EA</b>                               | <b>3</b>                    | <b>5</b>                    | <b>Tx (se discontinuó memantina)</b>           |
|                        | <b>DFT<sup>a</sup></b>      | <b>Enfermedad agriofílica granulosa</b> |                                         | <b>1</b>                    | <b>2</b>                    | <b>DL-</b>                                     |
| <b>PiB- /FDG-EA</b>    | <b>DFT</b>                  | <b>DLFT-Tau (Pick)</b>                  |                                         | <b>0</b>                    | <b>0</b>                    | <b>Tx (comenzó memantina)</b>                  |
|                        | <b>SCB-no-EA</b>            | <b>DCB<sup>b</sup></b>                  |                                         | <b>NA</b>                   | <b>NA</b>                   |                                                |
| <b>PiB- /FDG NA</b>    | DFT                         | TDP-43 tipo B                           | Tauopatía inespecífica                  | 0                           | 2                           | Tx (se discontinuó el I-Che)                   |

Abreviaturas: VS-APP = variante semántica de la afasia primaria progresiva; Aβ = β-amiloide; CERAD = Consortium to Establish a Registry for Alzheimer's disease; DCB = degeneración córtico-basal; DCL = demencia con cuerpos de Lewy; DFT = demencia fronto temporal; DFT-ELA= demencia fronto temporal-esclerosis lateral amiotrófica; vcDFT = variante conductual de la demencia fronto temporal; DL- = dilema diagnóstico resuelto; DL+ = dilema diagnóstico creado; DLFT = demencia lobar fronto temporal; Dx = cambio diagnóstico; EA = enfermedad de Alzheimer; FDG = fluorodesoxiglucosa; I-Che = inhibidor de la colinesterasa; NA = no disponible; PiB = Pittsburgh compound B; PPA-NF = variante no fluente de la afasia primaria progresiva; PSP = parálisis supranuclear progresiva; SCB-EA = síndrome córtico-basal con patología de Alzheimer esperada; SCB-no-EA = síndrome córtico-basal con patología esperada no Alzheimer; TDP-43 = TAR DNA-binding protein 43; Tx = cambio en el tratamiento (acción).

Los casos en los que los resultados del PET eran discordantes con el diagnóstico clínico pre-PET están enfatizados en negrita.

<sup>a</sup>Solamente presentó consumo focal de PiB en las cortezas parietal y occipital; en la autopsia se encontraron placas Aβ difusas frecuentes.

<sup>b</sup>Biopsia cerebral.

que el FDG fue clara cuando las dos imágenes estaban en desacuerdo en la clasificación de los pacientes (tabla 3). El PiB tuvo también un mayor efecto sobre el tratamiento de la EA y fue levemente más preciso cuando se los comparó con el diagnóstico *post mortem*. Mientras que actualmente la USCMS reembolsa el FDG, pero no el PET amiloide para el diagnóstico diferencial de la EA de la DFT, esta política no es consistente con los datos que demuestran que el PET amiloide es más específico, preciso y reproducible bioquímicamente que el FDG<sup>8</sup> y tiene un mayor efecto sobre los resultados clínicos en este escenario diagnóstico.

Encontramos un efecto modesto del PET amiloide sobre el tratamiento farmacológico de la EA, generado mayormente por la iniciación de I-Ches en pacientes con un diagnóstico no-Aβ que inesperadamente fueron PiB+. Tal vez este hallazgo re-

presente un “sesgo para tratar” dado el estado actual del tratamiento de la EA (sintomático más que modificador de la enfermedad, generalmente bien tolerado, y en la práctica generalmente utilizado fuera de la indicación aprobada (*off-label*) en la demencia no-EA<sup>28</sup>). Un estudio previo reportó un efecto levemente mayor sobre el tratamiento (un aumento del 18% en las drogas de la EA en pacientes florbetapir PET+ y una disminución del 23% en casos negativos).<sup>5</sup> Una explicación para esta discrepancia podría ser el comportamiento verdadero observado de los médicos *versus* la “intención de tratar” en el estudio de florbetapir, en el cual se les pidió a los médicos que no utilizaran los resultados de las imágenes para guiar el manejo del paciente. Adicionalmente, la alta tasa de uso de memantina en la DFT en nuestro estudio podría haber disminuido el efecto de los resultados de las imágenes sobre el tratamiento. El

estudio fue conducido en un momento en el cual la memantina estaba siendo evaluada en estudios clínicos para la DFT,<sup>29</sup> posiblemente estimulando el uso “*off-label*”. Ahora parece ser que ambos –los I-Ches y la memantina– están asociados con un *peor* resultado en la DFT,<sup>29-30</sup> lo cual destaca la importancia de un diagnóstico preciso.

Dado el diseño retrospectivo no fuimos capaces de evaluar el efecto del PET en la confianza diagnóstica, mientras que estudios previos encontraron que el PET amiloide lleva a un aumento en la certeza clínica.<sup>4-6</sup> Como representación, evaluamos los dilemas diagnósticos antes y después del PET y encontramos una tendencia para un decremento en el número de casos dudosos. Un aumento en la confianza diagnóstica podría proveer a los pacientes y sus familias mayor claridad sobre el pronóstico y limitar la utilización de recursos médicos.

Veinticuatro pacientes tenían estudios neuropatológicos que confirmaron una fuerte asociación entre el PET amiloide y la patología A $\beta$ .<sup>31,32</sup> Los casos patológicamente probados verificaron la utilidad del PET amiloide en la identificación de la EA en pacientes atípicos, resolviendo dilemas diagnósticos y guiando la terapia farmacológica de la EA. Dos pacientes también resaltan el inconveniente de sobreinterpretar una imagen amiloide positiva: ambos pacientes tenían un diagnóstico primario de DFT en la autopsia, junto con co-patología de EA. El estudio de impacto clínico del florbetapir reportó una disminución sustancial en el uso de medidas “estándar de cuidado” como por ejemplo evaluaciones cognitivas (33%) e imágenes estructurales (24%) en pacientes que habían sido sometidos a un PET amiloide.<sup>33</sup> Nuestros datos sugieren que se requiere mayor precaución en la interpretación de la significancia de las imágenes de amiloide dada la prevalencia de la co-patología y la complejidad de los pacientes vistos en centros de referencia de demencias.

Nuestro estudio tiene limitaciones. El diseño fue retrospectivo y no podemos separar completamente la influencia del PiB y FDG o control para la evolución de los síntomas clínicos o la disponibilidad de datos adicionales en la visita post-PET. El diseño de centro único limita la generalización de nuestros hallazgos, en particular hacia centros de práctica menos especializados. Los pacientes fueron derivados para un PET amiloide como parte de estudios de investigación que se focalizaron en poblaciones específicas de pacientes y no fueron diseñados para medir la influencia sobre el manejo clínico. Diagnósticos comúnmente encontrados en la práctica como la DCL, la demencia vascular y el DCM amnésico<sup>34</sup> no fueron representados en grandes números. El valor adicional del PET amiloide en casos difíciles podría estar subestimado, ya que los pacientes fueron evaluados por médicos que tienen gran experiencia en la evaluación de síndromes de demencia atípicos y el diagnóstico fue realizado por consenso. Los pacientes con comorbilidades significativas fueron excluidos, mientras que en la práctica la presencia de problemas clínicos que son factores de confusión podría ser una indicación del PET amiloide.<sup>27,35</sup> Las imágenes de amiloide fueron realizadas con el trazador PiB [<sup>11</sup>C] y no el [<sup>18</sup>F] que será más prevalente en la práctica clínica. Sin embargo, los estudios preliminares sugieren una performance comparable entre los ligandos de amiloide [<sup>18</sup>F] y PiB [<sup>11</sup>C].<sup>36-39</sup>

Últimamente, estudios como este reflejan un sesgo de los médicos en la interpretación de la significancia clínica de los resultados de las imágenes, a pesar de que los diagnósticos de las autopsias proveen una medida preliminar por la cual se puede juzgar la toma de decisiones clínicas. Se necesitan estudios prospectivos futuros para caracterizar mejor el rol clínico de las imágenes de amiloide en diferentes escenarios de cuidado y relativo a otros biomarcadores. También se necesitan estudios adicionales para estimar los efectos sobre los resultados clínicos que no pudieron ser evaluados en nuestro diseño retrospectivo, incluso manejo no farmacológico de los pacientes, resultados de los cuidadores y utilización de recursos.

## CONTRIBUCIONES DE LOS AUTORES

Dr. Gil D. Rabinovici: concepto y diseño del estudio. Dr. Pascual Sánchez-Juan y Dr. Gil D. Rabinovici: análisis de datos y escritura del manuscrito. Pia M. Ghosh, Dr. Jayne Hagen, Dr. Benno Gesierich, Dr. Maya Henry, Dr. Lea T. Grinberg, Dr. James P. O’Neil, Dr. Mustafa Janabi, Dr. Eric J. Huang, Dr. John Q. Trojanowski, Dr. Harry V. Vinters, Dr. Marilu Gorno-Tempini, Dr. William W. Seeley, Dr. Adam L. Boxer, Dr. Howard J. Rosen, Dr. Joel H. Kramer, Dr. Bruce L. Miller, Dr. William J. Jagust, Dr. Gil D. Rabinovici: adquisición de datos. Pia M. Ghosh, Dr. Jayne Hagen, Dr. Benno Gesierich, Dr. Maya Henry, Dr. Lea T. Grinberg, Dr. James P. O’Neil, Dr. Mustafa Janabi, Dr. Eric J. Huang, Dr. John Q. Trojanowski, Dr. Harry V. Vinters, Dr. Marilu Gorno-Tempini, Dr. William W. Seeley, Dr. Adam L. Boxer, Dr. Howard J. Rosen, Dr. Joel H. Kramer, Dr. Bruce L. Miller, Dr. William J. Jagust: revisión crítica del manuscrito.

## RECONOCIMIENTO

Los autores agradecen a los pacientes y sus familias por su participación y dedicación a la investigación; a Suzanne Baker, Matthew Growdon, Jung Jang, Baber Khan, Andrea Long, Cindee Madison, Teresa Wu y a Irene Yen por apoyo administrativo y técnico; y a Nick Vandehey por radioquímica.

## FINANCIAMIENTO DEL ESTUDIO

Este trabajo fue financiado por becas del: Institute for Formation and Research of the Foundation “Marqués de Valdecilla,” Instituto de Salud Carlos III (PI12/02288); European Union Joint Programme—Neurodegenerative Disease Research (DEMTEST PI11/03028); United States NIH K23-AG031861, R01-AG027859, R01-AG032306, R01-AG038791, P50-AG16570, P01-AG12435, P01-AG1972403 y P50-AG023501; State of California Department of Health Services Alzheimer’s Disease Research Center of California grant 04-33516; Alzheimer’s Association grant NIRG-07-59422; John Douglas French Alzheimer’s Foundation; Hellman Family Foundation y Tau Consortium.

## DECLARACIÓN DE INTERESES

P. Sánchez-Juan, P. Ghosh, J. Hagen, B. Gesierich, M. Henry, L. Grinberg, J. O’Neil, M. Janabi y E. Huang reportan no tener intereses que declarar. Al J. Trojanowski podrían corresponderle ingresos en el futuro sobre patentes presentadas por la University of Pennsylvania donde él es co-inventor y ha recibido ingresos de la venta Avid a Eli Lilly como co-inventor sobre patentes relacionadas con las imágenes presentadas por la University of Pennsylvania. H. Vinters tiene acciones en la bolsa de valores y ha recibido dividendos de 3M Corporation (equipamiento y suministros médicos), GE (equipamiento médico y de imágenes), Teva Pharma, Pfizer y GlaxoSmithKline. Beecham. M. Gorno-Tempini reporta no tener intereses que declarar. W. Seeley ha sido consultor para Bristol-Myers Squibb y Summer Street Research Partners. A. Boxer ha sido consultor para Bristol-Myers Squibb, Genentech, Plexikon, Phloronol, Registrat-Mapi, Accera, Archer, Envivo, Acetylon, Iperion, TauRx, Grifols, Neurophage y Novartis. El ha recibido financiamiento para investigación de Allon Therapeutics, Bristol-Myers Squibb, Janssen, Forest, Pfizer, Medivation y Genentech, y es financiado por grants del NIH R01AG038791 y R01AG031278, the John Douglas French Foundation, Alzheimer’s Drug Discovery Foundation, the Association for Frontotemporal Degeneration, the Silicon Valley Foundation, the Agouron Institute, the Tau Research Consortium y la Hellman Family Foundation. H. Rosen y J. Kramer reportan no tener intereses que declarar. B. Miller es miembro del comité de la Larry L. Hillblom Foundation, the John Douglas French Foundation, the Tau Consortium, Sagol School of Neuroscience y Tel Aviv University; ha hecho consultoría para Tau Rx, LTD, Allon, Bristol-Myers Squibb, Siemens Molecular Imaging, Eli Lilly US y Shire Human Genetic Therapies, Inc; ha recibido grants de Novartis; recibe regalías de Cambridge University Press y Guilford Publications, Inc.; y sirve como editor de Neurocase. W. Jagust ha sido consultor de Genentech, F. Hoffman LaRoche, Janssen Alzheimer Immunotherapy, y Sanofi, y es actualmente consultor para Synarc. G.

Rabinovici ha sido consultor para Eli Lilly y GE Healthcare, y recibe financiamiento para investigación de Avid Radiopharmaceuticals/Eli Lilly. Ir a [Neurology.org](http://Neurology.org) para declaraciones de intereses completas.

Recibido el 8 de mayo de 2013. Aceptado en su forma final el 3 de octubre de 2013.

## REFERENCIAS

1. Klunk WE, Engler H, Nordberg A, et al. Imaging brain amyloid in Alzheimer's disease with Pittsburgh Compound-B. *Ann Neurol* 2004;55:306–319.
2. Yang L, Rieves D, Ganley C. Brain amyloid imaging—FDA approval of florbetapir F18 injection. *N Engl J Med* 2012;367:885–887.
3. Schipke CG, Peters O, Heuser I, et al. Impact of beta-amyloid-specific florbetaben PET imaging on confidence in early diagnosis of Alzheimer's disease. *Dement Geriatr Cogn Disord* 2012;33:416–422.
4. Ossenkoppele R, Prins ND, Pijnenburg YA, et al. Impact of molecular imaging on the diagnostic process in a memory clinic. *Alzheimers Dement* 2013;9:414–421.
5. Grundman M, Pontecorvo MJ, Salloway SP, et al. Potential impact of amyloid imaging on diagnosis and intended management in patients with progressive cognitive decline. *Alzheimer Dis Assoc Disord* 2013;27:4–15.
6. Frederiksen KS, Hasselbalch SG, Hejl AM, et al. Added diagnostic value of (11)C-PiB-PET in memory clinic patients with uncertain diagnosis. *Dement Geriatr Cogn Dis Extra* 2012;2:610–621.
7. Centers for Medicare & Medicaid Services. Decision Memo for Beta Amyloid Positron Emission Tomography in Dementia and Neurodegenerative Disease (CAG-00431N). Published September 27, 2013. Available at: <http://www.cms.gov/medicare-coverage-database/details/nca-decision-memo.aspx?NCAID=265>. Accessed December 5, 2013.
8. Rabinovici GD, Rosen HJ, Alkalay A, et al. Amyloid vs FDG-PET in the differential diagnosis of AD and FTLD. *Neurology* 2011;77:2034–2042.
9. Rosenbloom MH, Alkalay A, Agarwal N, et al. Distinct clinical and metabolic deficits in PCA and AD are not related to amyloid distribution. *Neurology* 2011;76:1789–1796.
10. Rabinovici GD, Jagust WJ, Furst AJ, et al. Abeta amyloid and glucose metabolism in three variants of primary progressive aphasia. *Ann Neurol* 2008;64:388–401.
11. Rabinovici GD, Furst AJ, Alkalay A, et al. Increased metabolic vulnerability in early-onset Alzheimer's disease is not related to amyloid burden. *Brain* 2010;133:512–528.
12. Lehmann M, Ghosh PM, Madison C, et al. Diverging patterns of amyloid deposition and hypometabolism in clinical variants of probable Alzheimer's disease. *Brain* 2013;136:844–858.
13. McKhann G, Drachman DA, Folstein M, et al. Clinical diagnosis of Alzheimer's disease: report of the NINCDS-ADRDA Work Group under the auspices of Department of Health and Human Services Task Force on Alzheimer's Disease. *Neurology* 1984;34:939–944.
14. Neary D, Snowden JS, Gustafson L, et al. Frontotemporal lobar degeneration: a consensus on clinical diagnostic criteria. *Neurology* 1998;51:1546–1554.
15. Gorno-Tempini ML, Hillis AE, Weintraub S, et al. Classification of primary progressive aphasia and its variants. *Neurology* 2011;76:1006–1014.
16. Boxer AL, Geschwind MD, Belfor N, et al. Patterns of brain atrophy that differentiate corticobasal degeneration syndrome from progressive supranuclear palsy. *Arch Neurol* 2006;63:81–86.
17. McKeith IG, Dickson DW, Lowe J, et al. Diagnosis and management of dementia with Lewy bodies: third report of the DLB Consortium. *Neurology* 2005;65:1863–1872.
18. Petersen RC. Mild cognitive impairment as a diagnostic entity. *J Intern Med* 2004;256:183–194.
19. McMonagle P, Deering F, Berliner Y, Kertesz A. The cognitive profile of posterior cortical atrophy. *Neurology* 2006;66:331–338.
20. Lee SE, Rabinovici GD, Mayo MC, et al. Clinicopathological correlations in corticobasal degeneration. *Ann Neurol* 2011;70:327–340.
21. Consensus recommendations for the postmortem diagnosis of Alzheimer's disease. The National Institute on Aging, and Reagan Institute Working Group on diagnostic criteria for the neuropathological assessment of Alzheimer's disease. *Neurobiol Aging* 1997;18:S1–S2.
22. Mackenzie IR, Neumann M, Bigio EH, et al. Nomenclature and nosology for neuropathologic subtypes of frontotemporal lobar degeneration: an update. *Acta Neuropathol* 2010;119:1–4.
23. McKhann GM, Knopman DS, Chertkow H, et al. The diagnosis of dementia due to Alzheimer's disease: Recommendations from the National Institute on Aging-Alzheimer's Association workgroups on diagnostic guidelines for Alzheimer's disease. *Alzheimers Dement* 2011;7:263–269.
24. Dubois B, Feldman HH, Jacova C, et al. Revising the definition of Alzheimer's disease: a new lexicon. *Lancet Neurol* 2010;9:1118–1127.
25. Caso F, Gesierich B, Henry M, et al. Nonfluent/agrammatic PPA with in-vivo cortical amyloidosis and Pick's disease pathology. *Behav Neurol* 2013;26:95–106.
26. Lockhart A, Lamb JR, Osredkar T, et al. PIB is a nonspecific imaging marker of amyloid-beta (Abeta) peptide related cerebral amyloidosis. *Brain* 2007;130:2607–2615.
27. Johnson KA, Minoshima S, Bohnen NI, et al; Alzheimer's Association, Society of Nuclear Medicine and Molecular Imaging, Amyloid Imaging Taskforce. Appropriate use criteria for amyloid PET: a report of the Amyloid Imaging Task Force, the Society of Nuclear Medicine and Molecular Imaging, and the Alzheimer's Association. *Alzheimers Dement* 2013;9(1):e1–e16.
28. Bei H, Ross L, Neuhaus J, et al. Off-label medication use in frontotemporal dementia. *Am J Alzheimers Dis Other Dement* 2010;25:128–133.
29. Boxer AL, Knopman DS, Kaufer DI, et al. Memantine in patients with frontotemporal lobar degeneration: a multicentre, randomised, double-blind, placebo-controlled trial. *Lancet Neurol* 2013;12:149–156.
30. Mendez MF, Lee AS, Joshi A, Shapira JS. Nonamnestic presentations of early-onset Alzheimer's disease. *Am J Alzheimers Dis Other Dement* 2012;27:413–420.
31. Clark CM, Pontecorvo MJ, Beach TG, et al. Cerebral PET with florbetapir compared with neuropathology at autopsy for detection of neuritic amyloid-beta plaques: a prospective cohort study. *Lancet Neurol* 2012;11:669–678.
32. Ikonovic MD, Klunk WE, Abrahamson EE, et al. Postmortem correlates of in vivo PiB-PET amyloid imaging in a typical case of Alzheimer's disease. *Brain* 2008;131:1630–1645.
33. Knopman DS, DeKosky ST, Cummings JL, et al. Practice parameter: diagnosis of dementia (an evidence-based review). Report of the Quality Standards Subcommittee of the American Academy of Neurology. *Neurology* 2001;56:1143–1153.
34. Schneider JA, Aggarwal NT, Barnes L, et al. The neuropathology of older persons with and without dementia from community versus clinic cohorts. *J Alzheimers Dis* 2009;18:691–701.
35. Laforce R Jr, Rabinovici GD. Amyloid imaging in the differential diagnosis of dementia: review and potential clinical applications. *Alzheimers Res Ther* 2011;3:31.
36. Landau SM, Breault C, Joshi AD, et al. Amyloid-beta imaging with Pittsburgh compound B and florbetapir: comparing radiotracers and quantification methods. *J Nucl Med* 2013;54:70–77.



37. Vandenberghe R, Van Laere K, Ivanoiu A, et al. 18F flutemetamol amyloid imaging in Alzheimer disease and mild cognitive impairment: a phase 2 trial. *Ann Neurol* 2010;68:319–329.
38. Rowe CC, Pejoska S, Mulligan RS, et al. Head-to-head comparison of 11C-PiB and 18F-AZD4694 (NAV4694) for beta-amyloid imaging in aging and dementia. *J Nucl Med* 2013;54:880–886.
39. Villemagne VL, Mulligan RS, Pejoska S, et al. Comparison of 11C-PiB and 18F-florbetaben for Abeta imaging in ageing and Alzheimer's disease. *Eur J Nucl Med Mol Imaging* 2012;39:983–989.
